# Supplementary material for: Stochastic Amplification of Fluctuations in Cortical Up-States
Source: PubMed Central journal article supplement (PMC3413692; doi:10.1371/journal.pone.0040710), 2012-08-07
Supplement: pone.0040710.s004.pdf [file pone.0040710.s004.pdf]

# Appendix S4 for “Stochastic Amplification of Fluctuations in Cortical Up-states”

Jorge Hidalgo, Luís F. Seoane, Jesús M. Cortés and Miguel A. Muñoz

Departamento de Electromagnetismo y Física de la Materia and Instituto de Física Teórica y Computacional Carlos I. Facultad de Ciencias, Universidad de Granada, E-18071 Granada, Spain

## Power spectrum of fluctuations for the synaptic depression variable

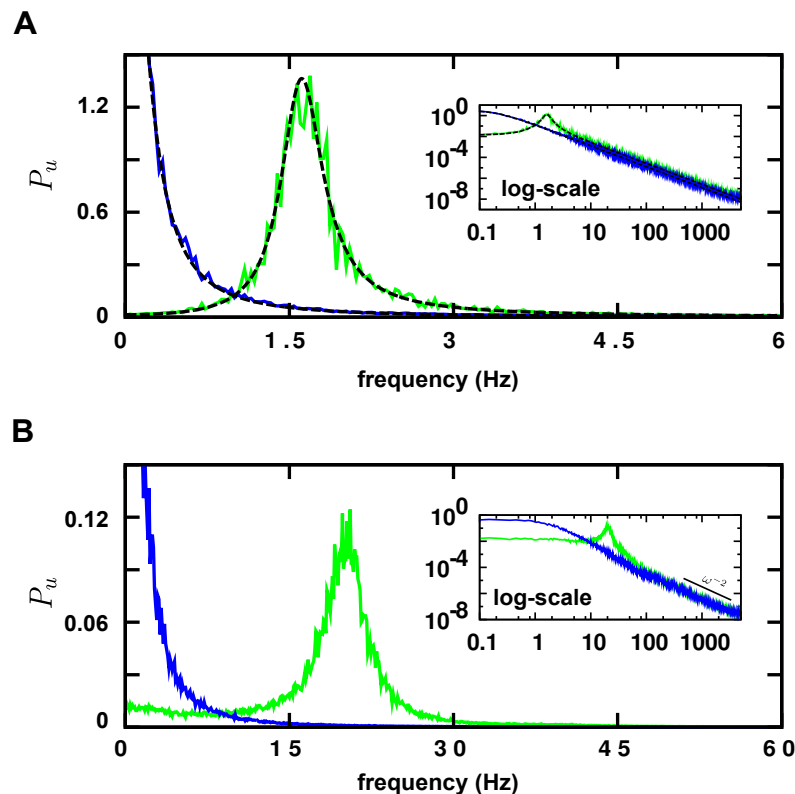

**Figure S4.** Power spectrum for the variable synaptic depression variable,  $u$ , in Up and in Down states for (A) Model A and (B) Model B, respectively. Plots are normalized to unit area. As in Fig. 2 of main text, similar peaks appear for Up (green curves) but not for Down (blue curves): (A)  $\approx 1.6$  Hz and (B)  $\approx 20$  Hz. Insets present power spectra in double logarithmic scale; spectra exhibit a  $\omega^{-2}$  tail indicating the presence of many different scales.
