# Supplementary material for: Stochastic Amplification of Fluctuations in Cortical Up-States
Source: PubMed Central journal article supplement (PMC3413692; doi:10.1371/journal.pone.0040710), 2012-08-07
Supplement: pone.0040710.s006.pdf [file pone.0040710.s006.pdf]

# Appendix S6 for “Stochastic Amplification of Fluctuations in Cortical Up-states”

Jorge Hidalgo, Luís F. Seoane, Jesús M. Cortés and Miguel A. Muñoz

Departamento de Electromagnetismo y Física de la Materia and Instituto de Física Teórica y  
Computacional Carlos I. Facultad de Ciencias, Universidad de Granada, E-18071 Granada,  
Spain

## Power-spectrum evaluation for Model B

To firmly establish the correspondence between the phenomenology described for Model B in the main text and stochastic amplification we need to write down a set of effective Langevin equations (analogous to equation 1 in the main text) for the network averaged variables and, from it, compute power-spectra. This turns out to be a non-trivial task.

Our starting point is equation (S2-2). Multiplying it by  $V$  and integrating over all possible values of the membrane potential variable

$$\begin{aligned}
 \dot{v}(t) &= \int_{V_r}^{\theta} V \frac{\partial P(V, t)}{\partial t} dV = V D \frac{\partial P(V, t)}{\partial V} \Big|_{V_r}^{\theta} - D \int_{V_r}^{\theta} \frac{\partial P(V, t)}{\partial V} dV \\
 &\quad - V \nu_d(V) P(V, t) \Big|_{V_r}^{\theta} + \int_{V_r}^{\theta} \nu_d(V) P(V, t) dV \\
 &= \theta D \frac{\partial P(\theta, t)}{\partial V} - V_r D \frac{\partial P(V_r, t)}{\partial V} + D P(V_r, t) + V_r \nu_d(V_r) P(V_r, t) + \int_{V_r}^{\theta} \nu_d(V) P(V, t) dV \\
 &= -(\theta - V_r) f(t) - \frac{v - V_r}{RC} + V_e f_e + K u V_{in} f(t) + D P(V_r, t), \tag{S6-1}
 \end{aligned}$$

where boundary conditions have been imposed and  $\tau_{rp}$  has been, for simplicity, neglected.

The self-consistent method used for solving equation (S2-2) together with equation (S2-4) provides  $v^*$ ,  $u^*$ ,  $f^*$  and  $P(V_r)^*$ , computed via the mean, the slope in  $\theta$  and the value in  $V_r$  of the steady state solution  $P(V)$ . Results are shown in Table S6. Differences with simulation results ( $\langle v \rangle_{up} = -61.67$  mV,  $\langle u \rangle_{up} = 0.2352$ ;  $\langle v \rangle_{down} = -68.3$  mV,  $\langle u \rangle_{down} = 0.997$ ) stem from the relatively small value  $n_r = 6$  used in simulations; as explained above, the Fokker-Planck approach is strictly valid for  $n_r \rightarrow \infty$ .

In the case of finite networks,  $P(V_r, t)$  and  $f(t)$  become fluctuating time-dependent variables. Fig. S6-1 illustrates the result of numerical simulations for network of various sizes for the firing rate:  $f(t)$  is observed to be strongly correlated with  $v(t)$ ; the larger the average potential the larger the fraction of neurons firing per unit time. The inset of Fig. S6-1, where  $f$  is plotted as a function of  $v$  and  $u$ , illustrates the existence of two well-defined branches, one for up-to-down transitions and another for down-to-up, when  $f$  is considered a function of  $v$ .

|                         | Up ( $p_r = 0.5$ ) | Down ( $p_r = 0.2$ ) |
|-------------------------|--------------------|----------------------|
| $v^*$ (mV)              | -61.16             | -66.54               |
| $u^*$                   | 0.2108             | 0.999996             |
| $f^*$ (Hz)              | 74.88              | 0.000216             |
| $P(V_r)^*$ ( $V^{-1}$ ) | 40.75              | 150.04               |

**Table S6.** Results obtained from the Up and Down steady state distributions shown in Fig. S2.

For the forthcoming analytical calculations,  $f$  can be well approximated by a threshold-linear (or “split”) function of  $v$  plus a noise, and with this we describe its shape in both Up and Down states. The noise amplitude, as shown in Fig. S6-2 decreases with network-size as expected on the central limit theorem basis.

As for the probability density of neurons at the resting state,  $P(V_r, t)$ , it is consider as a constant of value  $P(V_r)^*$  for simplicity.

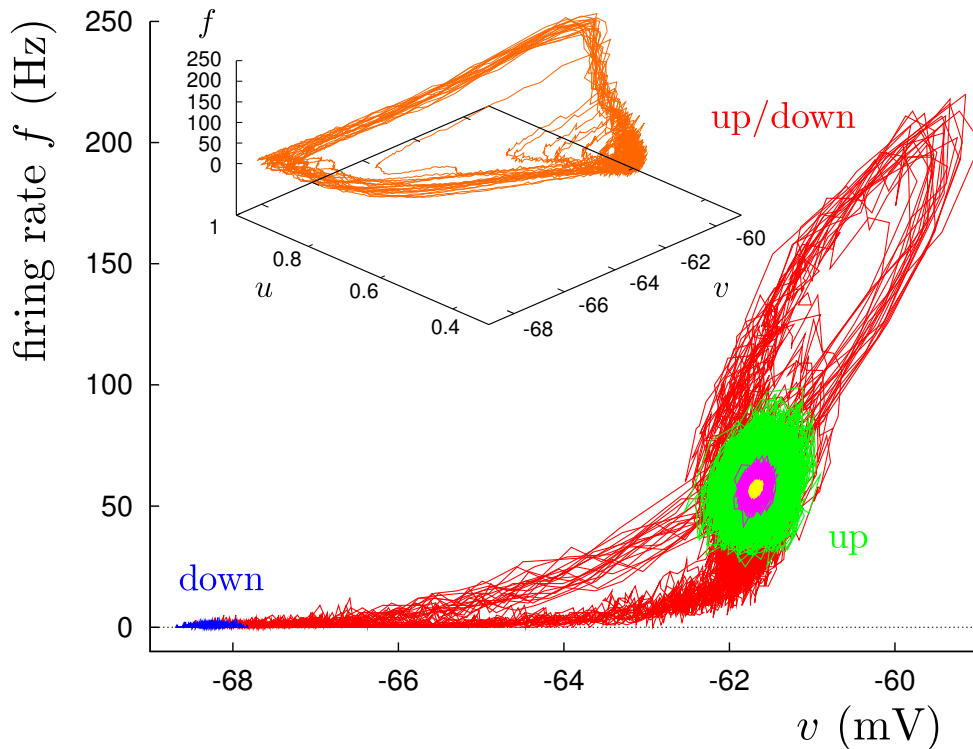

**Figure S6-1.** Main: Firing rate  $f$  as a function of the mean membrane potential  $v$  for various finite-size networks in the model of Millman *et al.* for (red) the Up-and-Down state  $p_r = 0.3$  and  $N = 10^3$ , (blue) Down-state  $p_r = 0.2$  and  $N = 10^3$ , and (green  $N = 10^3$ , magenta  $10^4$ , and yellow  $N = 10^5$ ) Up-state  $p_r = 0.5$ . By increasing the system size the cloud of points converges to the steady state fixed point. The approximate linear fit is:  $f_{\text{up}}(v) = (12.86 \pm 0.05 \text{ Hz/mV})v + (850 \pm 3)\text{Hz}$  for the Up-state and  $f(v) = 0$  for the Down-state. Even in the case of Up-and-Down states,  $f(v)$  can be well approximated by a bi-valuated function with two branches: one for transitions Down-to-Up and other for Up-to-Down. Inset:  $f$  as a function of both  $v$  and  $u$  illustrating the origin of the two branches above.

Having an analytical approximation for  $f(v)$  it is now possible to perform a lineal

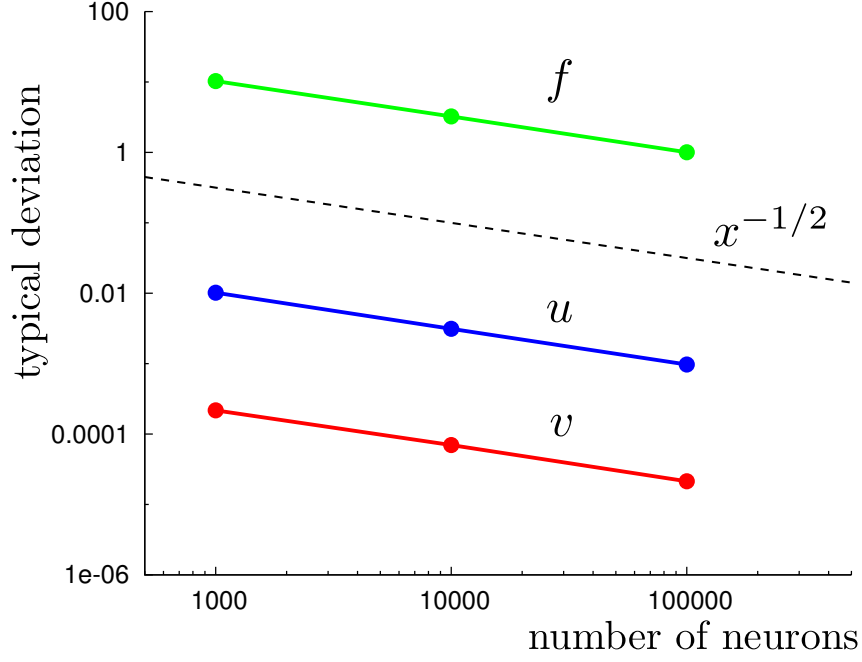

**Figure S6-2.** Typical deviation of fluctuations for different variables as a function of the system size. Simulations -computed for a persistent Up state- show a decay of  $1/\sqrt{N}$ , as expected on the basis of the central limit theorem.

stability analysis. Defining  $x = v - v^*$  and  $y = u - u^*$  as the linear deviations from the deterministic fixed points, the corresponding Jacobian matrix is specified as follows:

$$\begin{aligned}
a_{vv} &= -\frac{1}{RC} + f' \left\{ n_s u \bar{V}_{in} \left( 1 + \frac{1}{2} u \bar{V}_{in} P(V_r) \right) - (\theta - V_r) \right\} \\
&\quad + G \left\{ \bar{V}_e f_e + n_s f u \bar{V}_{in} + 2DP(V_r) \right\} \\
a_{vu} &= n_s \bar{V}_{in} f \left\{ 1 + u \bar{V}_{in} P(V_r) \right\} \\
a_{uv} &= -u p_r f' \\
a_{uu} &= -\frac{1}{\tau_R} - p_r f
\end{aligned} \tag{S6-2}$$

where  $G$  is the derivative of the re-scaling factor of the incoming currents (see S7) which depends on  $f(v)$ :

$$G \equiv \frac{\tau_s f' \left\{ e^{-\frac{1}{f\tau_s}} \left( 1 + \frac{1}{\tau_s f} \right) - 1 \right\}}{1 - f\tau_s \left\{ 1 - e^{-\frac{1}{f\tau_s}} \right\}} \tag{S6-3}$$

giving a non-trivial correction.

At the Up-state fixed point this leads to  $a_{vv} = -120.12$  Hz,  $a_{vu} = 10.4272$  V·Hz,  $a_{uv} = -1355.44$  Hz/V,  $a_{uu} = -47.4422$  Hz for the coefficients of the stability matrix, and hence a minimum at the denominator of  $P(w)$  at  $w_0 = 76.1$  rad/s  $\implies f_0 = 12.11$  Hz. Instead, in the Down-state, the equation for  $u$  becomes decoupled from that for  $v$ , resulting in the absence of a non-trivial peak in the spectrum (complex  $\omega_0$ ), even for a small but non zero firing rate.
